# Supplementary material
Source: Springer Nature journal article supplement (https://www.springermedizin.de/resource/supplementary/12906_2013_1597_MOESM3_ESM.pdf/9522350)
Supplement: MOESM3 [file 9522350]

(A)

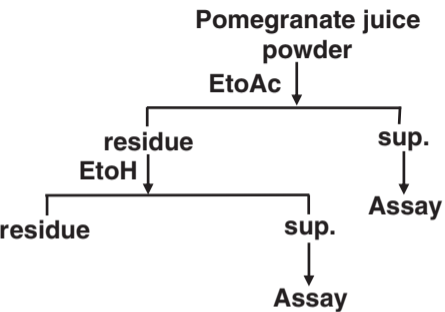

(B)

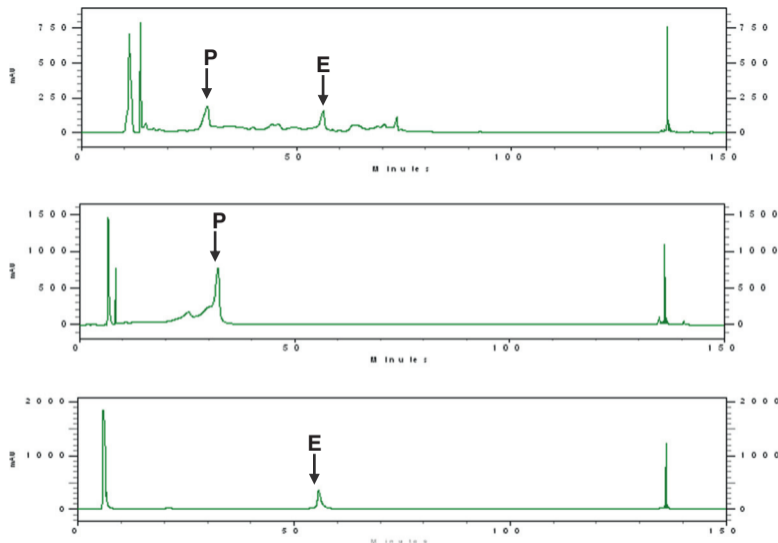

| Peak     | Retention time | Peak              | Retention time |
|----------|----------------|-------------------|----------------|
| P in PEE | 29.21 min      | Pure punicalagin  | 31.74 min      |
| E in PEE | 56.32 min      | Pure ellagic acid | 55.63 min      |
